# Supplementary material
Source: MDPI journal article supplement (https://www.mdpi.com/1424-2818/14/4/294)
Supplement: s1 [file s1]

**Table S3.** Minimum interspecific and maximum intraspecific uncorrected *p*-distances (%) based on the COI, H3 and 28S markers.

| <b>NSpecies</b>                                   | <b>1</b> | <b>2</b> | <b>3</b> | <b>4</b> | <b>5</b> | <b>6</b> | <b>7</b> | <b>8</b> | <b>9</b> |
|---------------------------------------------------|----------|----------|----------|----------|----------|----------|----------|----------|----------|
| <b>COI marker</b>                                 |          |          |          |          |          |          |          |          |          |
| <b>1</b> <i>Coryphellina rubrolineata</i>         | 0.99     |          |          |          |          |          |          |          |          |
| <b>2</b> <i>Coryphellina lotos</i>                | 12.35    | 1.48     |          |          |          |          |          |          |          |
| <b>3</b> <i>Coryphellina pseudolotos</i> sp. nov. | 12.10    | 9.63     | 4.20     |          |          |          |          |          |          |
| <b>4</b> <i>Coryphellina pannae</i> sp. nov.      | 13.33    | 10.62    | 12.35    | 1.73     |          |          |          |          |          |
| <b>5</b> <i>Coryphellina flamma</i> sp. nov.      | 13.58    | 9.38     | 10.62    | 13.33    | 3.95     |          |          |          |          |
| <b>6</b> <i>Coryphellina aurora</i> sp. nov.      | 13.33    | 13.33    | 13.58    | 11.60    | 14.81    | n/a      |          |          |          |
| <b>7</b> <i>Coryphellina</i> sp. A                | 13.58    | 8.64     | 13.09    | 12.84    | 15.31    | 16.30    | 0.99     |          |          |
| <b>8</b> <i>Coryphellina</i> sp. B                | 16.30    | 13.58    | 16.79    | 15.31    | 13.09    | 15.56    | 15.31    | n/a      |          |
| <b>9</b> <i>Coryphellina exoptata</i>             | 16.30    | 13.33    | 13.83    | 15.31    | 15.56    | 15.31    | 14.81    | 16.54    | 4.20     |
| <b>H3 marker</b>                                  |          |          |          |          |          |          |          |          |          |
| <b>1</b> <i>Coryphellina rubrolineata</i>         | 0        |          |          |          |          |          |          |          |          |
| <b>2</b> <i>Coryphellina lotos</i>                | 4.29     | 0        |          |          |          |          |          |          |          |
| <b>3</b> <i>Coryphellina pseudolotos</i> sp. nov. | 4.29     | 0        | 0        |          |          |          |          |          |          |
| <b>4</b> <i>Coryphellina pannae</i> sp. nov.      | 3.86     | 3.86     | 3.86     | 0        |          |          |          |          |          |
| <b>5</b> <i>Coryphellina flamma</i> sp. nov.      | 4.29     | 1.72     | 1.72     | 3.00     | 0        |          |          |          |          |
| <b>6</b> <i>Coryphellina aurora</i> sp. nov.      | 3.43     | 4.29     | 4.29     | 2.15     | 3.43     | n/a      |          |          |          |
| <b>7</b> <i>Coryphellina</i> sp. A                | 4.72     | 0.43     | 0.43     | 4.72     | 2.15     | 4.72     | 0        |          |          |
| <b>8</b> <i>Coryphellina</i> sp. B                | n/a      |          |
| <b>9</b> <i>Coryphellina exoptata</i>             | 7.73     | 8.15     | 8.15     | 7.73     | 7.30     | 7.73     | 8.15     | n/a      | 0        |
| <b>28S marker</b>                                 |          |          |          |          |          |          |          |          |          |
| <b>1</b> <i>Coryphellina rubrolineata</i>         | 0        |          |          |          |          |          |          |          |          |
| <b>2</b> <i>Coryphellina lotos</i>                | 11.81    | 0        |          |          |          |          |          |          |          |
| <b>3</b> <i>Coryphellina pseudolotos</i> sp. nov. | 12.18    | 0.37     | 0        |          |          |          |          |          |          |
| <b>4</b> <i>Coryphellina pannae</i> sp. nov.      | 12.55    | 5.17     | 4.80     | 0        |          |          |          |          |          |
| <b>5</b> <i>Coryphellina flamma</i> sp. nov.      | 11.44    | 1.85     | 2.21     | 4.8      | 0        |          |          |          |          |
| <b>6</b> <i>Coryphellina aurora</i> sp. nov.      | 11.81    | 5.17     | 5.54     | 5.9      | 3.32     | n/a      |          |          |          |
| <b>7</b> <i>Coryphellina</i> sp. A                | 13.28    | 1.48     | 1.48     | 6.27     | 3.32     | 6.64     | n/a      |          |          |
| <b>8</b> <i>Coryphellina</i> sp. B                | n/a      |          |
| <b>9</b> <i>Coryphellina exoptata</i>             | 17.71    | 12.18    | 12.18    | 12.55    | 11.44    | 13.28    | 11.07    | n/a      | 0.74     |
